# Supplementary material
Source: PubMed Central journal article supplement (PMC3340174)
Supplement: supp_M111.311670_jbc.M111.311670-1.pdf [file supp_M111.311670_jbc.M111.311670-1.pdf]

## SUPPLEMENTAL MATERIALS

**Supplemental Figure 1: eA1 G-H loop mutants exhibiting similar activity to eA1-WT.** Western blot of EphA2 immunoreactivity in U-251 MG cells treated with CM from: eA1-F108A, eA1-K118A, eA1-K121A for 24 hr. Equivalent dosing was verified by Western blotting; eA1-Fc (1 mg/ml) and eA1-WT CM were used as positive controls.

**Supplemental Figure 2: Other than alanine substitutions at position 115 of eA1 do not retain an ability to down-regulate EphA2.** Western blot of EphA2 immunoreactivity in U-251 MG cells treated with CM from T115R, T115D, and T115G for 24 hr.

**Supplemental Figure 3: Binding of eA1-WT measured by SPR.** SPR-determined profiles for eA1 monomer and dimer binding to EphA2. Maximum binding signals (RU) vs. concentration were obtained in a BIOcore T100 instrument by delivering each protein (dimer, squares; monomer, circles) to a EphA2 covalently coupled to a CM5 biosensor. Fitting the data to a single-site saturable binding model by nonlinear regression (SigmaPlot 11, SYSTAT Software, Santa Fe, CA) yielded  $B_{max} = 229 \pm 7$  RU,  $K_d = 89 \pm 21$  nM for eA1-Fc (solid line); monomer,  $B_{max} = 163 \pm 26$  RU,  $K_d = 580 \pm 240$  nM (dashed line).

**Supplemental Figure 4: GBM cells rounding caused by eA1-WT and recombinant eA1-mutants. A)** 1.0  $\mu$ g/ml and **B)** 0.1  $\mu$ g/ml concentrations were used. Phase-contrast microscopy after 30 min treatment of U-251 MG GBM cells. The pictures were taken at 20x magnification.

**Supplemental Table 1: eA1 G-H loop alanine substitution mutants and primers used for site-directed mutagenesis.**



Figure s2

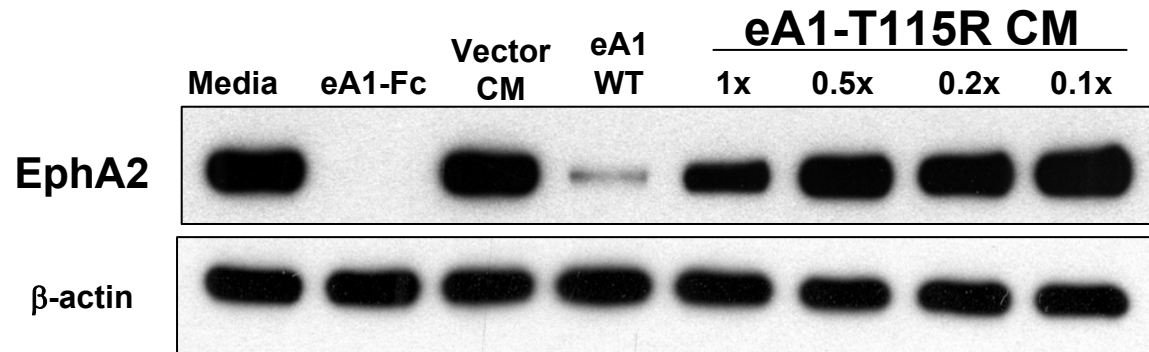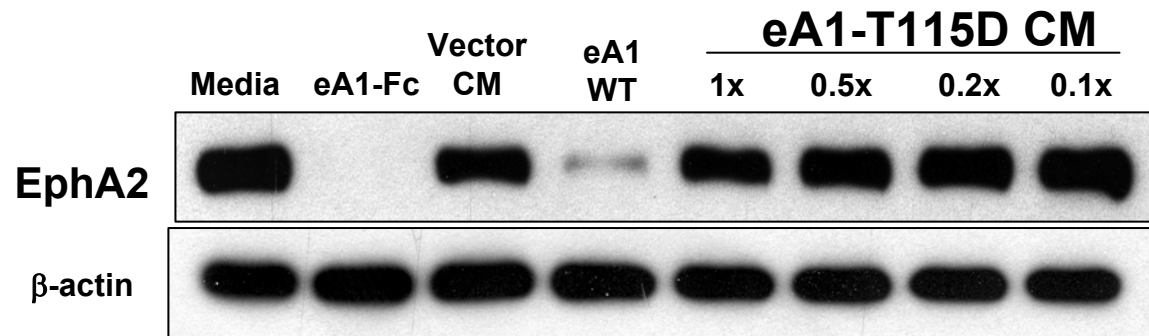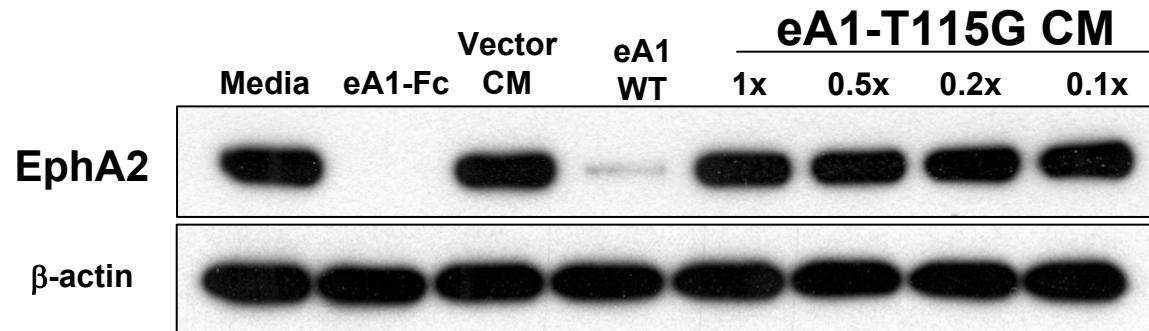

Figure s3

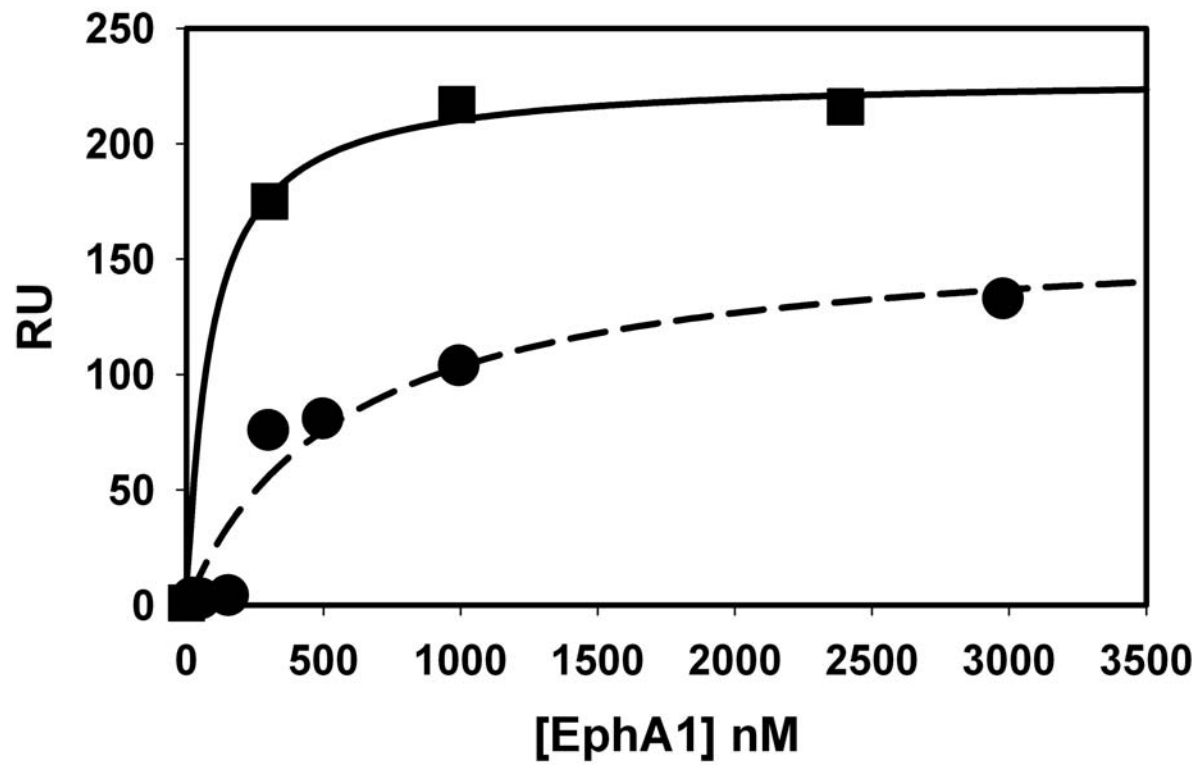

**Figure s4A**

**eA1 (1.0  $\mu\text{g/ml}$ )**

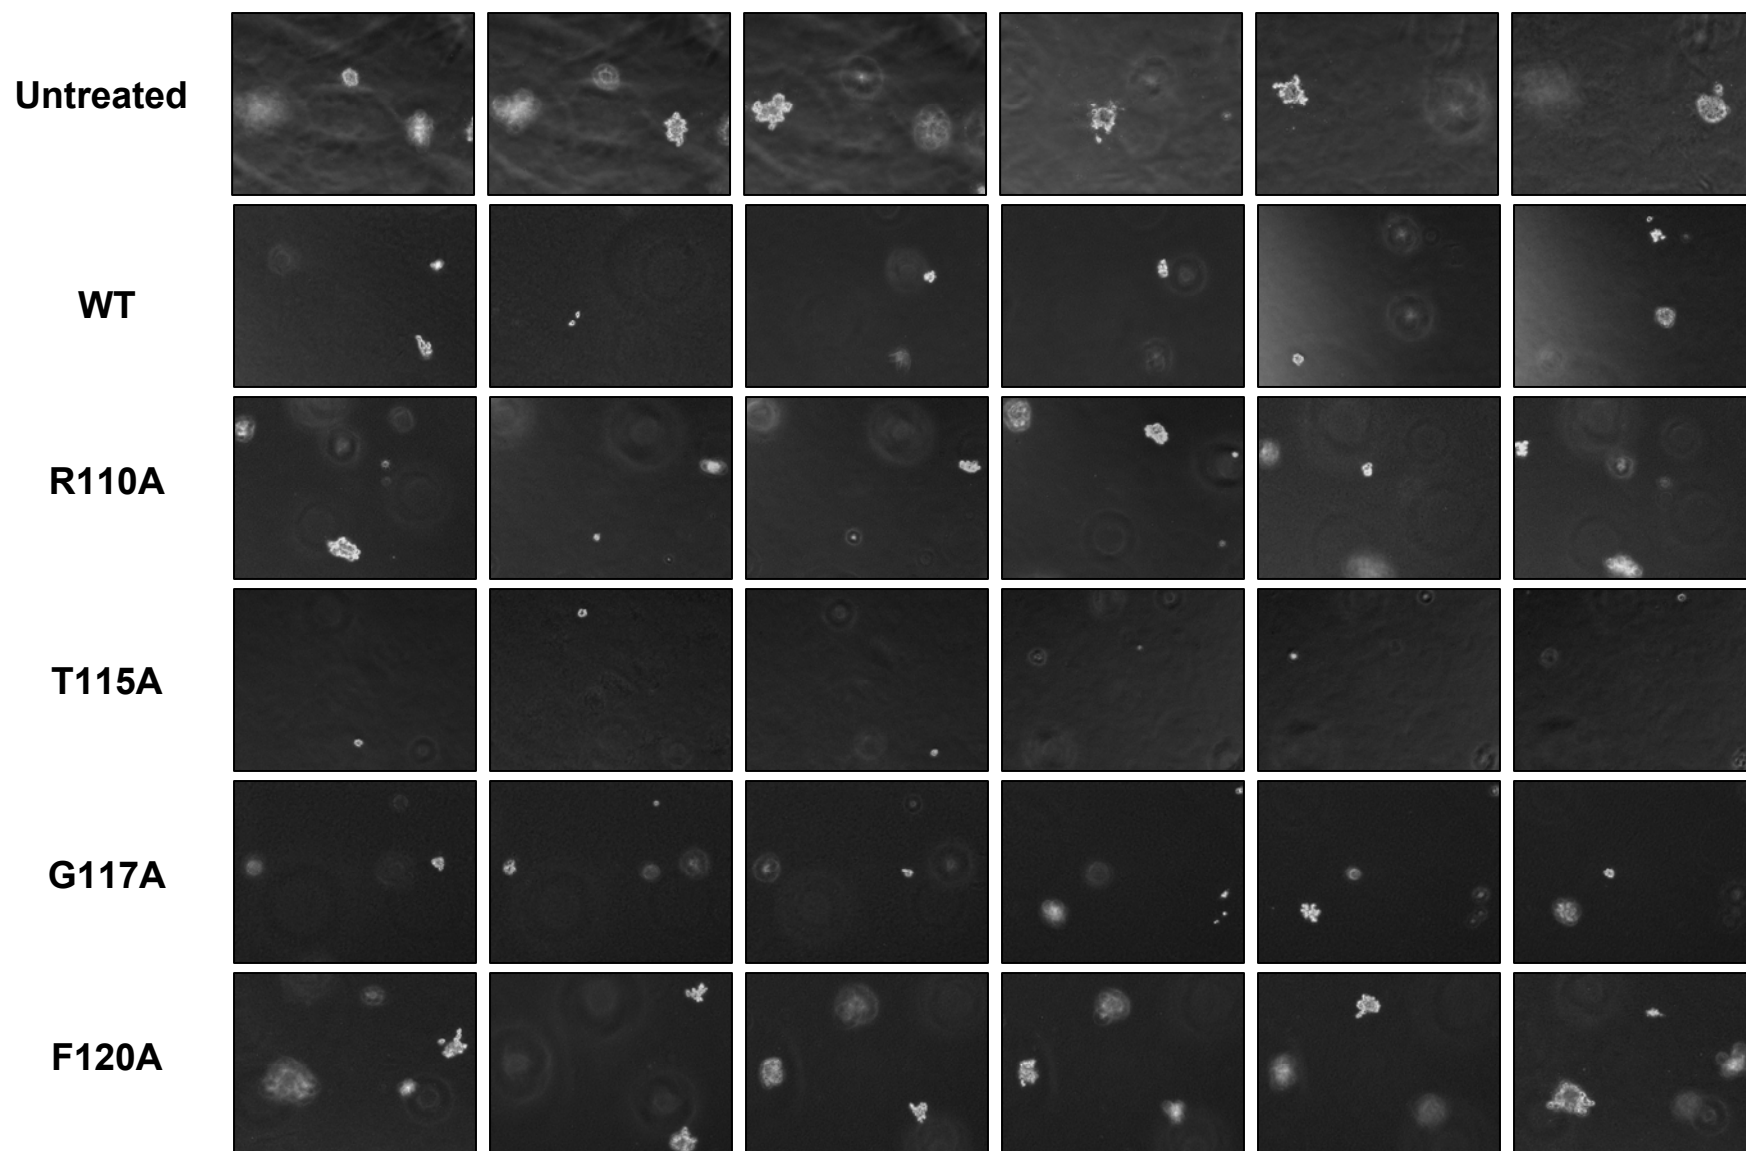

**Figure s4B**

**eA1 (0.1  $\mu\text{g/ml}$ )**

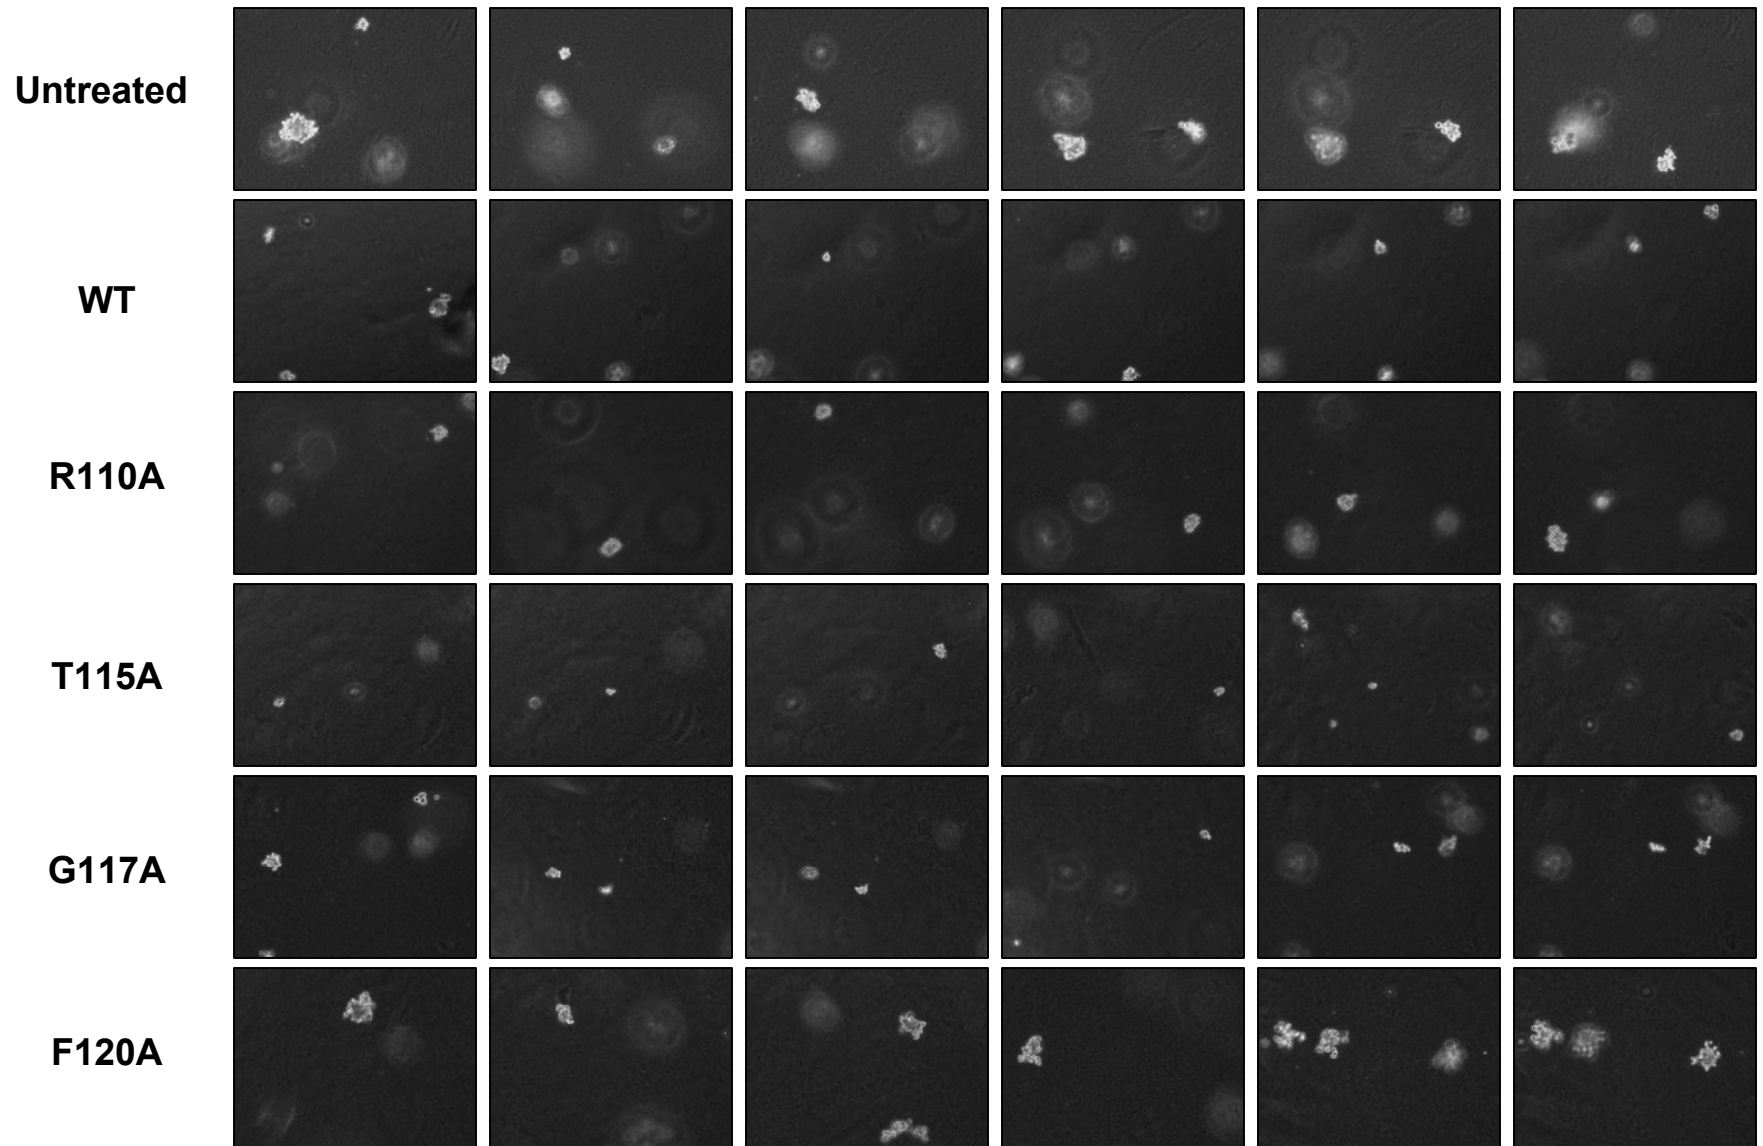

**Supplemental Table 1: eA1 G-H loop alanine substitution mutants and primers used for site-directed mutagenesis.**

| <b>Mutant</b> | <b>Primer</b>                                      |
|---------------|----------------------------------------------------|
| F108A         | 5'-GAAGCTGTCTGAGAAGGCCCAACGCTTCACACCTT-3'          |
| Q109A         | 5'-GCTGTCTGAGAAGTTCGCGCGCTTCACACCTTTCAC-3'         |
| R110A         | 5'-CTGTCTGAGAAGTTCAGGCCTTCACACCTTTCACCCCTG-3'      |
| F111A         | 5'-GAAGTTCAGCGCGCCACACCTTTCACCCTG-3'               |
| T112A         | 5'-GTCTGAGAAGTTCAGAGGTTTCGCACCTTTCACCCTGGG-3'      |
| P113A         | 5'-GTTCCAGCGCTTCACAGCTTTCACCCTGGGCAAG-3'           |
| F114A         | 5'-GTTCCAGCGCTTCACACCTGCCACATTGGGCAAGGAGTTCAAAG-3' |
| T115A         | 5'-GCGCTTCACACCTTTCGCATTGGGCAAGGAGTTCAAAG3'        |
| L116A         | 5'-GCGCTTCACACCTTTCACCGCAGGCAAGGAGTTCAAAGAAGG-3'   |
| G117A         | 5'- TTCACCCTGGGCAAGGCGTTCAAAGAAGGACACAG-3'         |
| K118A         | 5'-CACACCTTTCACCCTGGGCGCGGAGTTCAAAGAAGGACAC-3'     |
| E119A         | 5'-TTCACACCTTTCACCCTGGGCAAGGCGTTCAAAGAAGGACACA-3'  |
| F120A         | 5'- CACACCTTTCACCCTGGGCAAGGAGGCCAAAGAAGGACAC-3'    |
| K121A         | 5'-CACCTGGGCAAAGAGTTCGCAGAAGGACACAGC-3'            |
| E122A         | 5'-CACCTGGGCAAAGAGTTCAAAGCAGGACACAGC-3'            |
| G123A         | 5'-CCCTGGGCAAAGAGTTCAAAGAAGCACACAGCTAC-3'          |
